# Supplementary material
Source: publisher figshare collection journal article supplement (https://brill.figshare.com/articles/dataset/_/21781706)
Supplement: Supplementary file 1 [file 1]

# **DUS descriptors based morphometric characterization to analyze genetic variability in gladiolus**

Varun M. Hiremath, Kanwar Pal Singh\*, Kishan Swaroop, Sapna Panwar, Pooja A. and Tejukumar B.K.

Division of Floriculture and Landscaping, ICAR-Indian Agricultural Research Institute, New Delhi, 110012, India

\*Corresponding author; e-mail: [kanwariari@gmail.com](mailto:kanwariari@gmail.com)

ORCID iD: Singh: 0000-0002-1173-8428

**Supplementary material**
